# Supplementary material for: Epigenetic timing effects on child developmental outcomes: A longitudinal meta-regression of findings from the Pregnancy And Childhood Epigenetics Consortium
Source: bioRxiv or medRxiv preprint supplement (doi:10.1101/2024.02.29.24303506), 2024-02-29
Supplement: Supplementary file [file media-2.pdf]

### Effect size

Full sample size

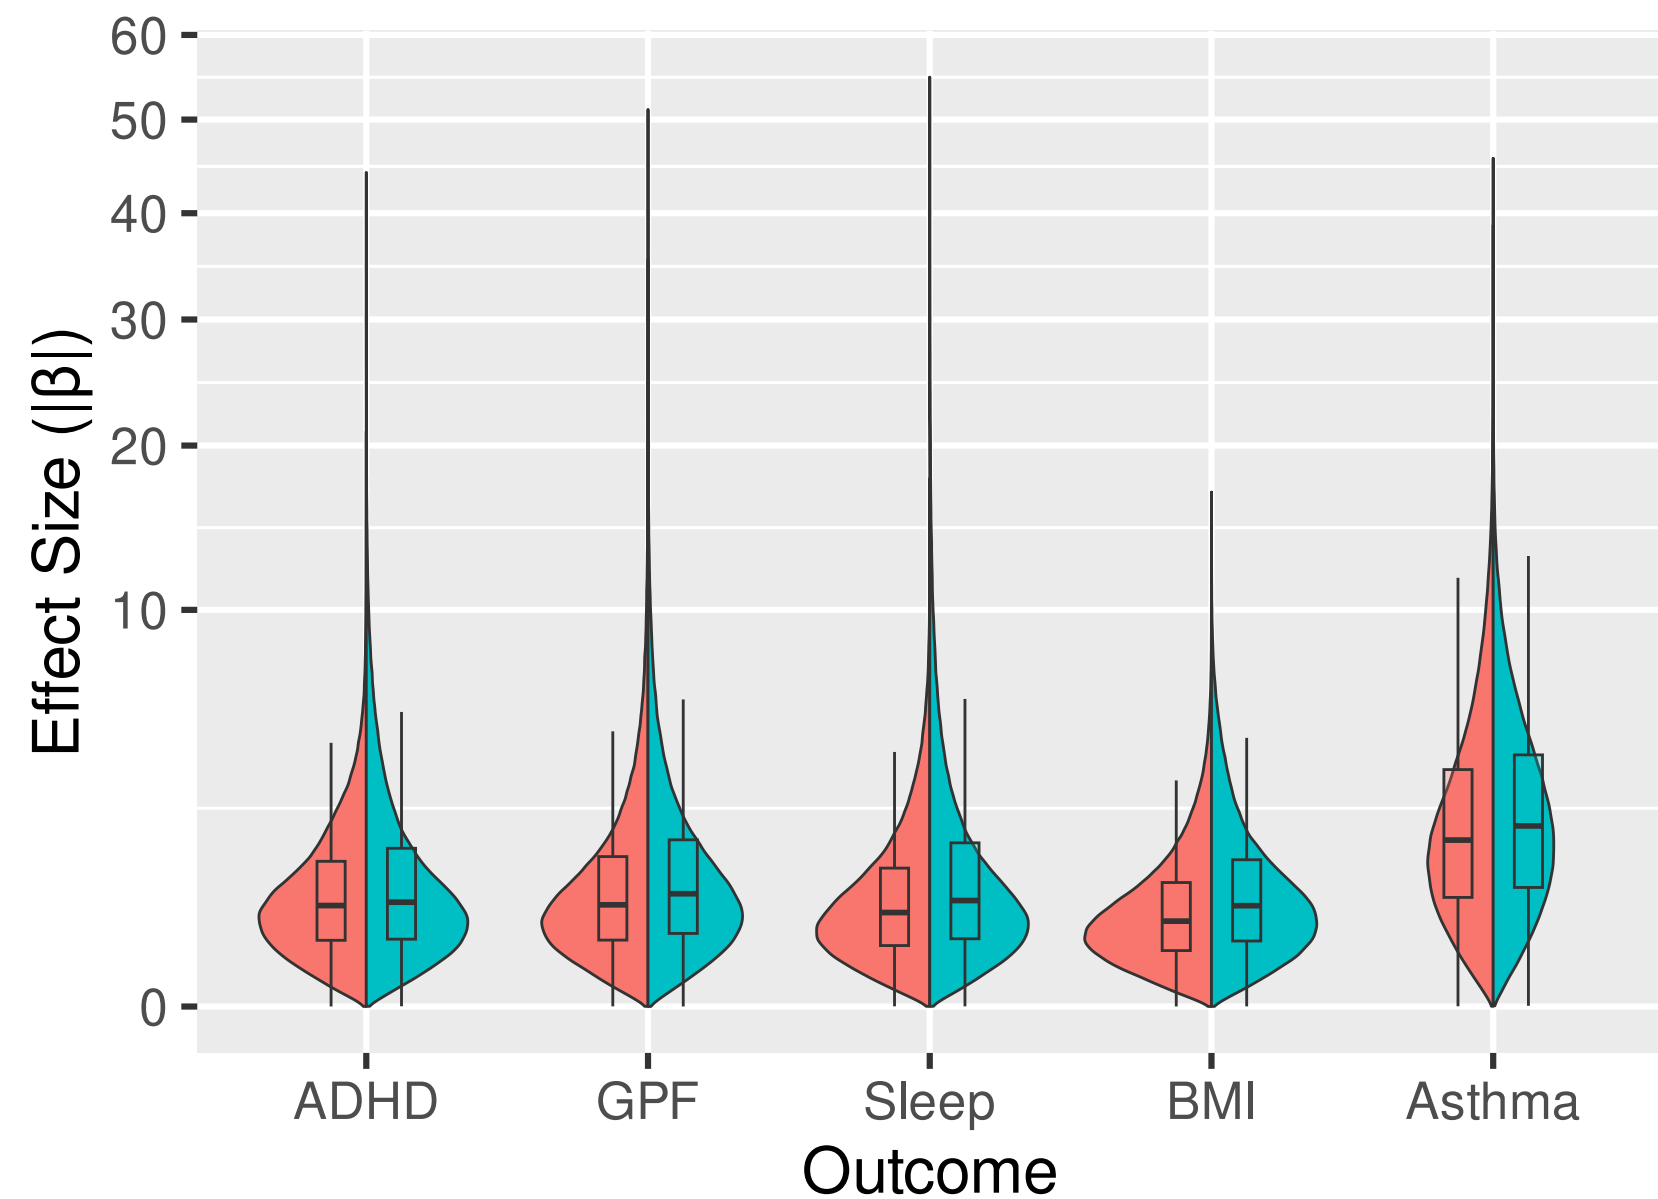

### Statistical significance

Full sample size

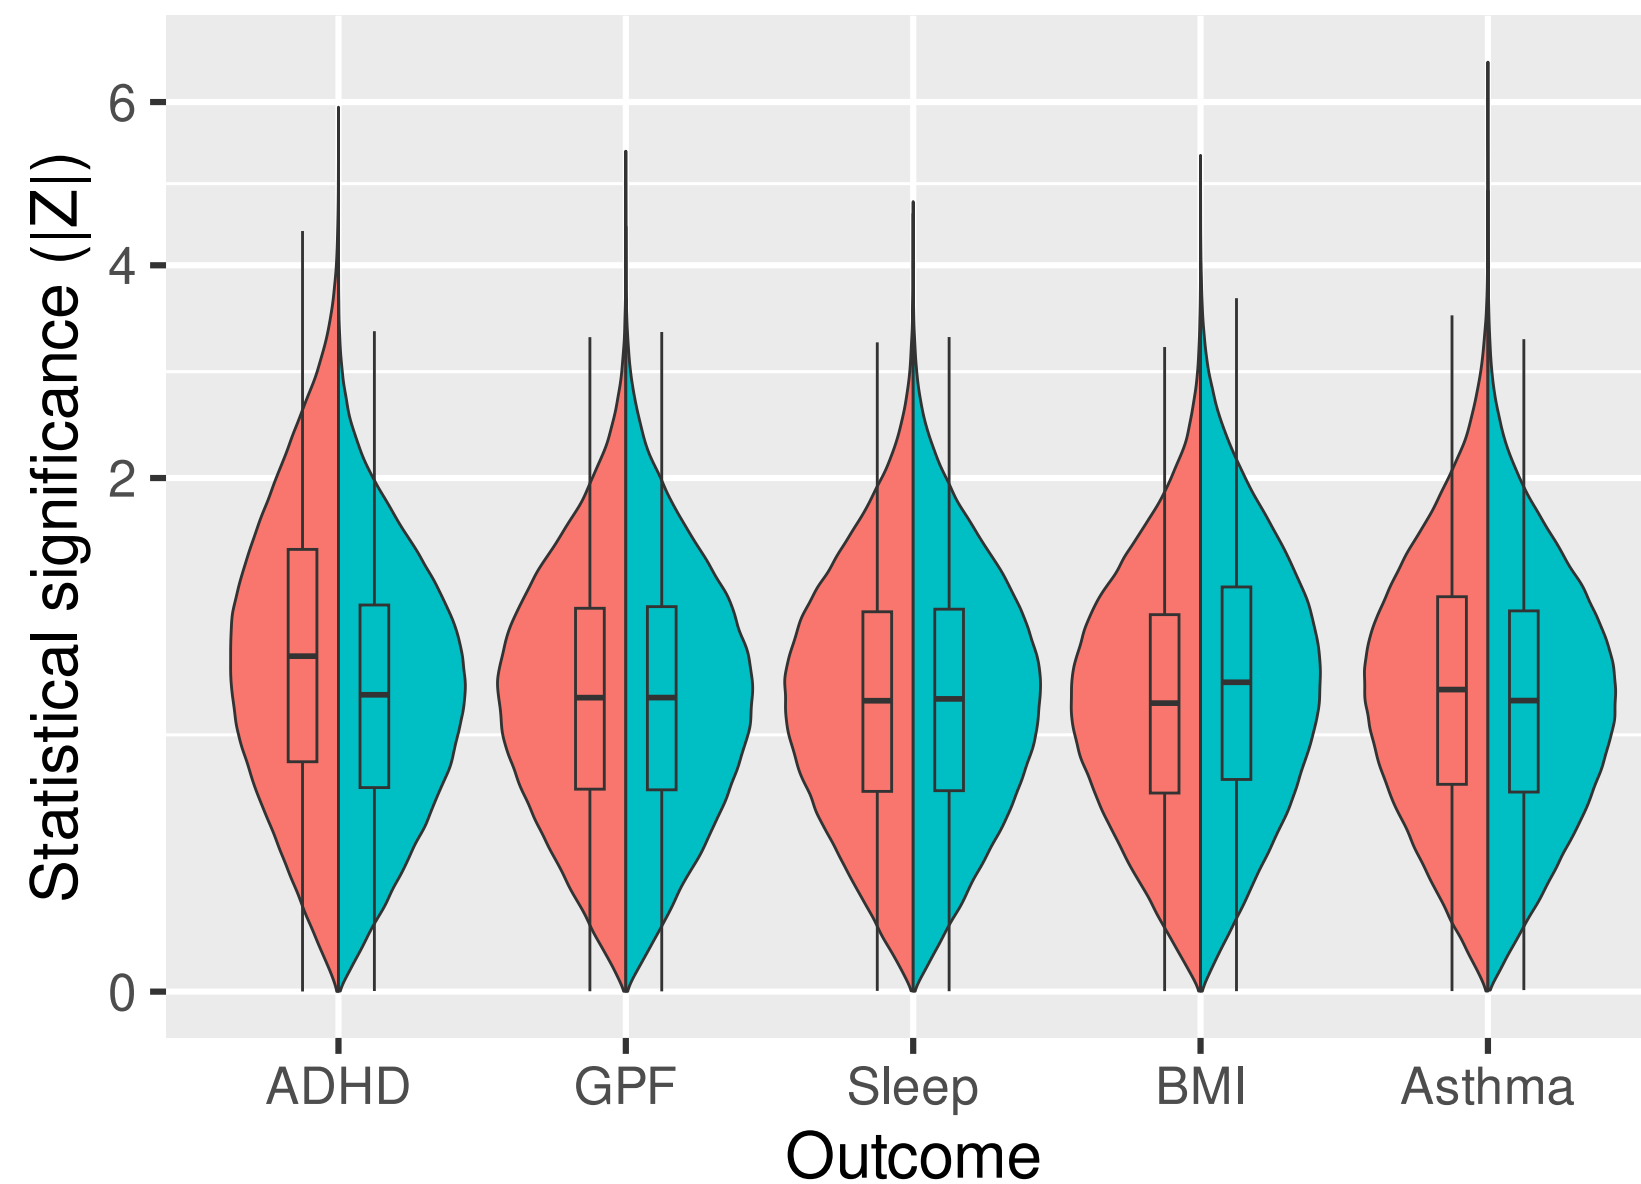

### Effect size

Equal sample sizes birth and childhood

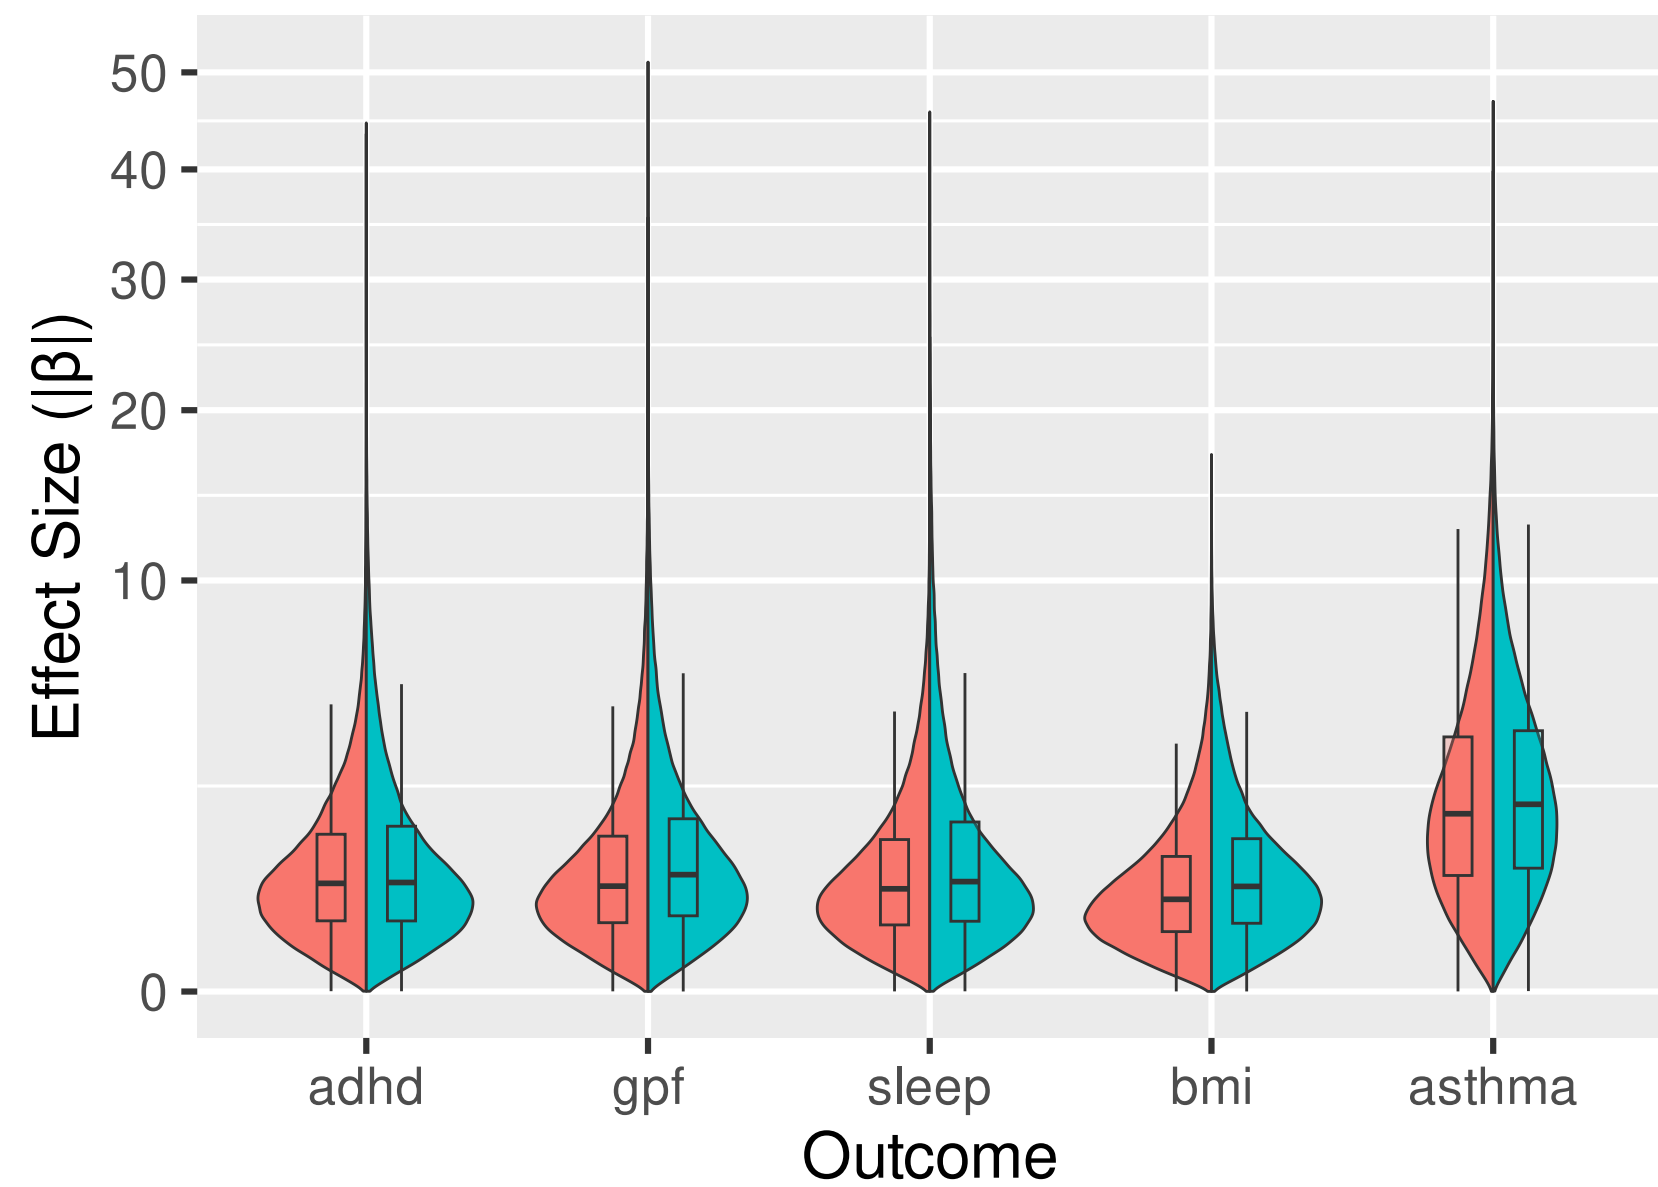

### Statistical significance

Equal sample sizes birth and childhood

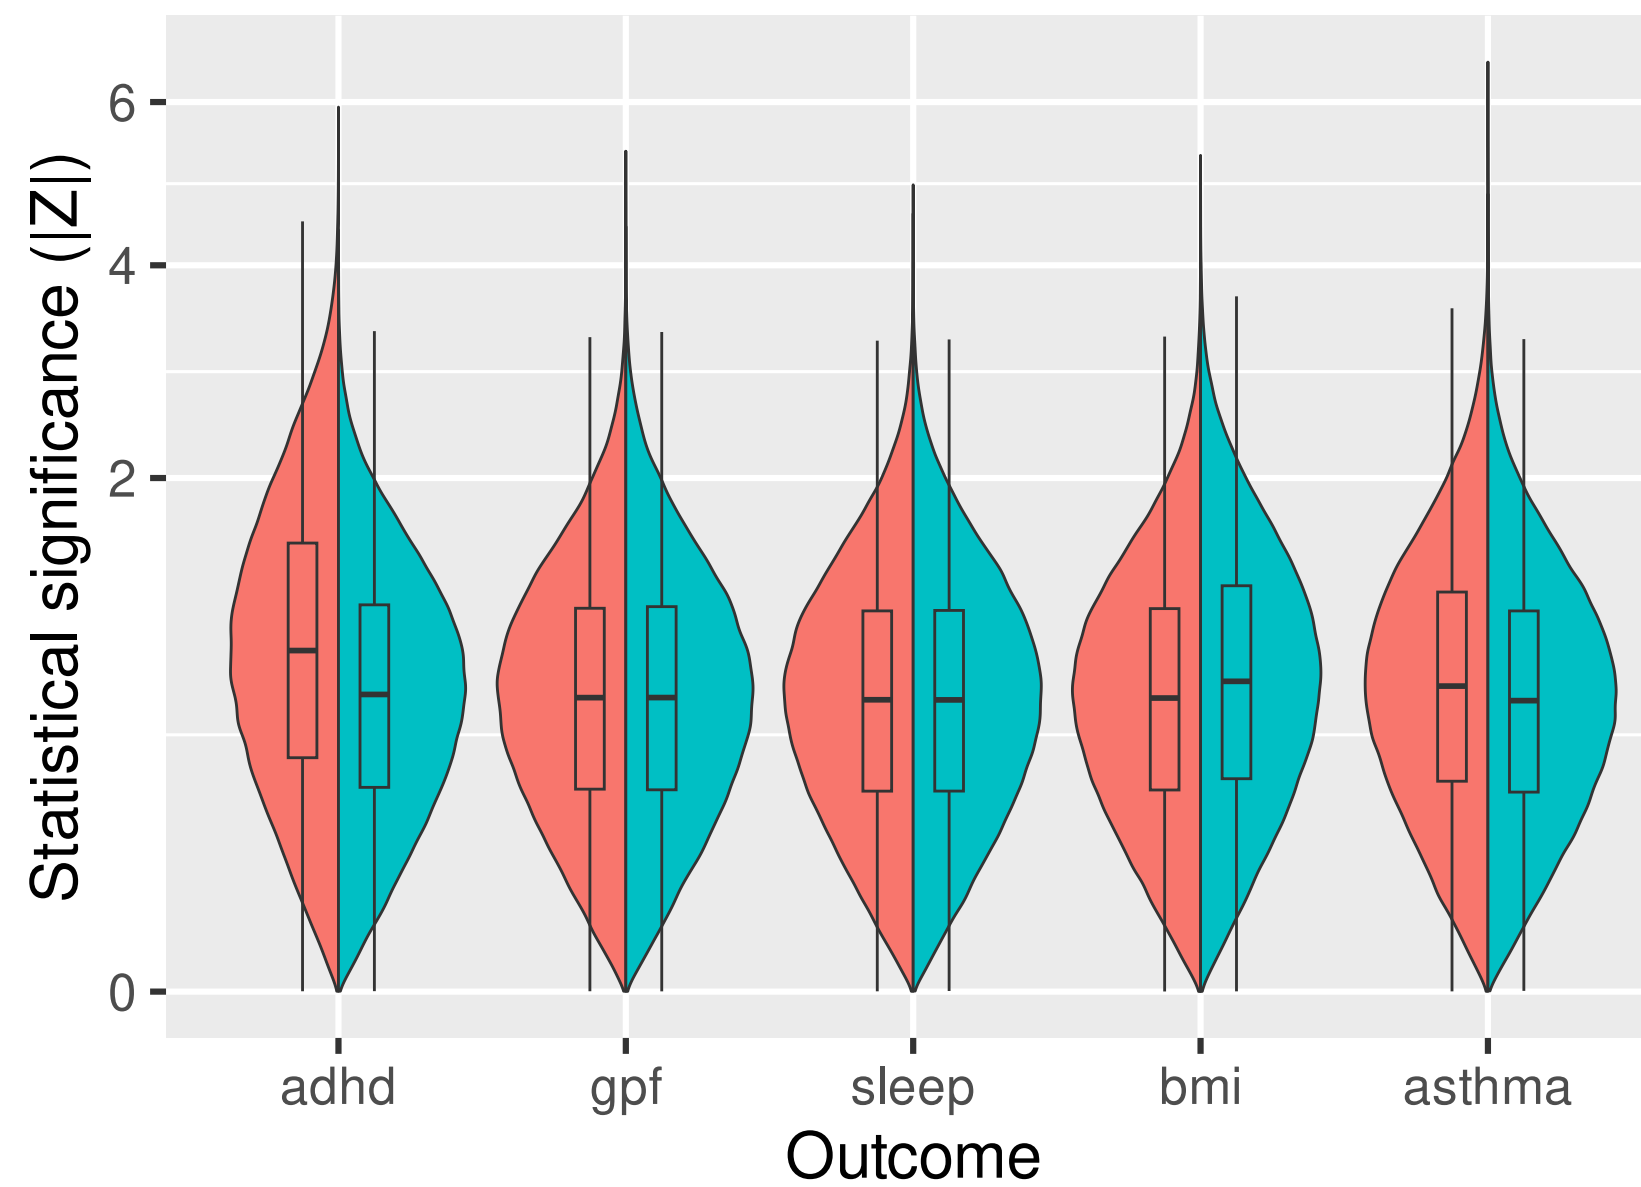

Methylation Assessment

- Birth
- Childhood
