# Supplementary material for: Epigenetic timing effects on child developmental outcomes: A longitudinal meta-regression of findings from the Pregnancy And Childhood Epigenetics Consortium
Source: bioRxiv or medRxiv preprint supplement (doi:10.1101/2024.02.29.24303506), 2024-02-29

Effect size change ratio across different p-value thresholds

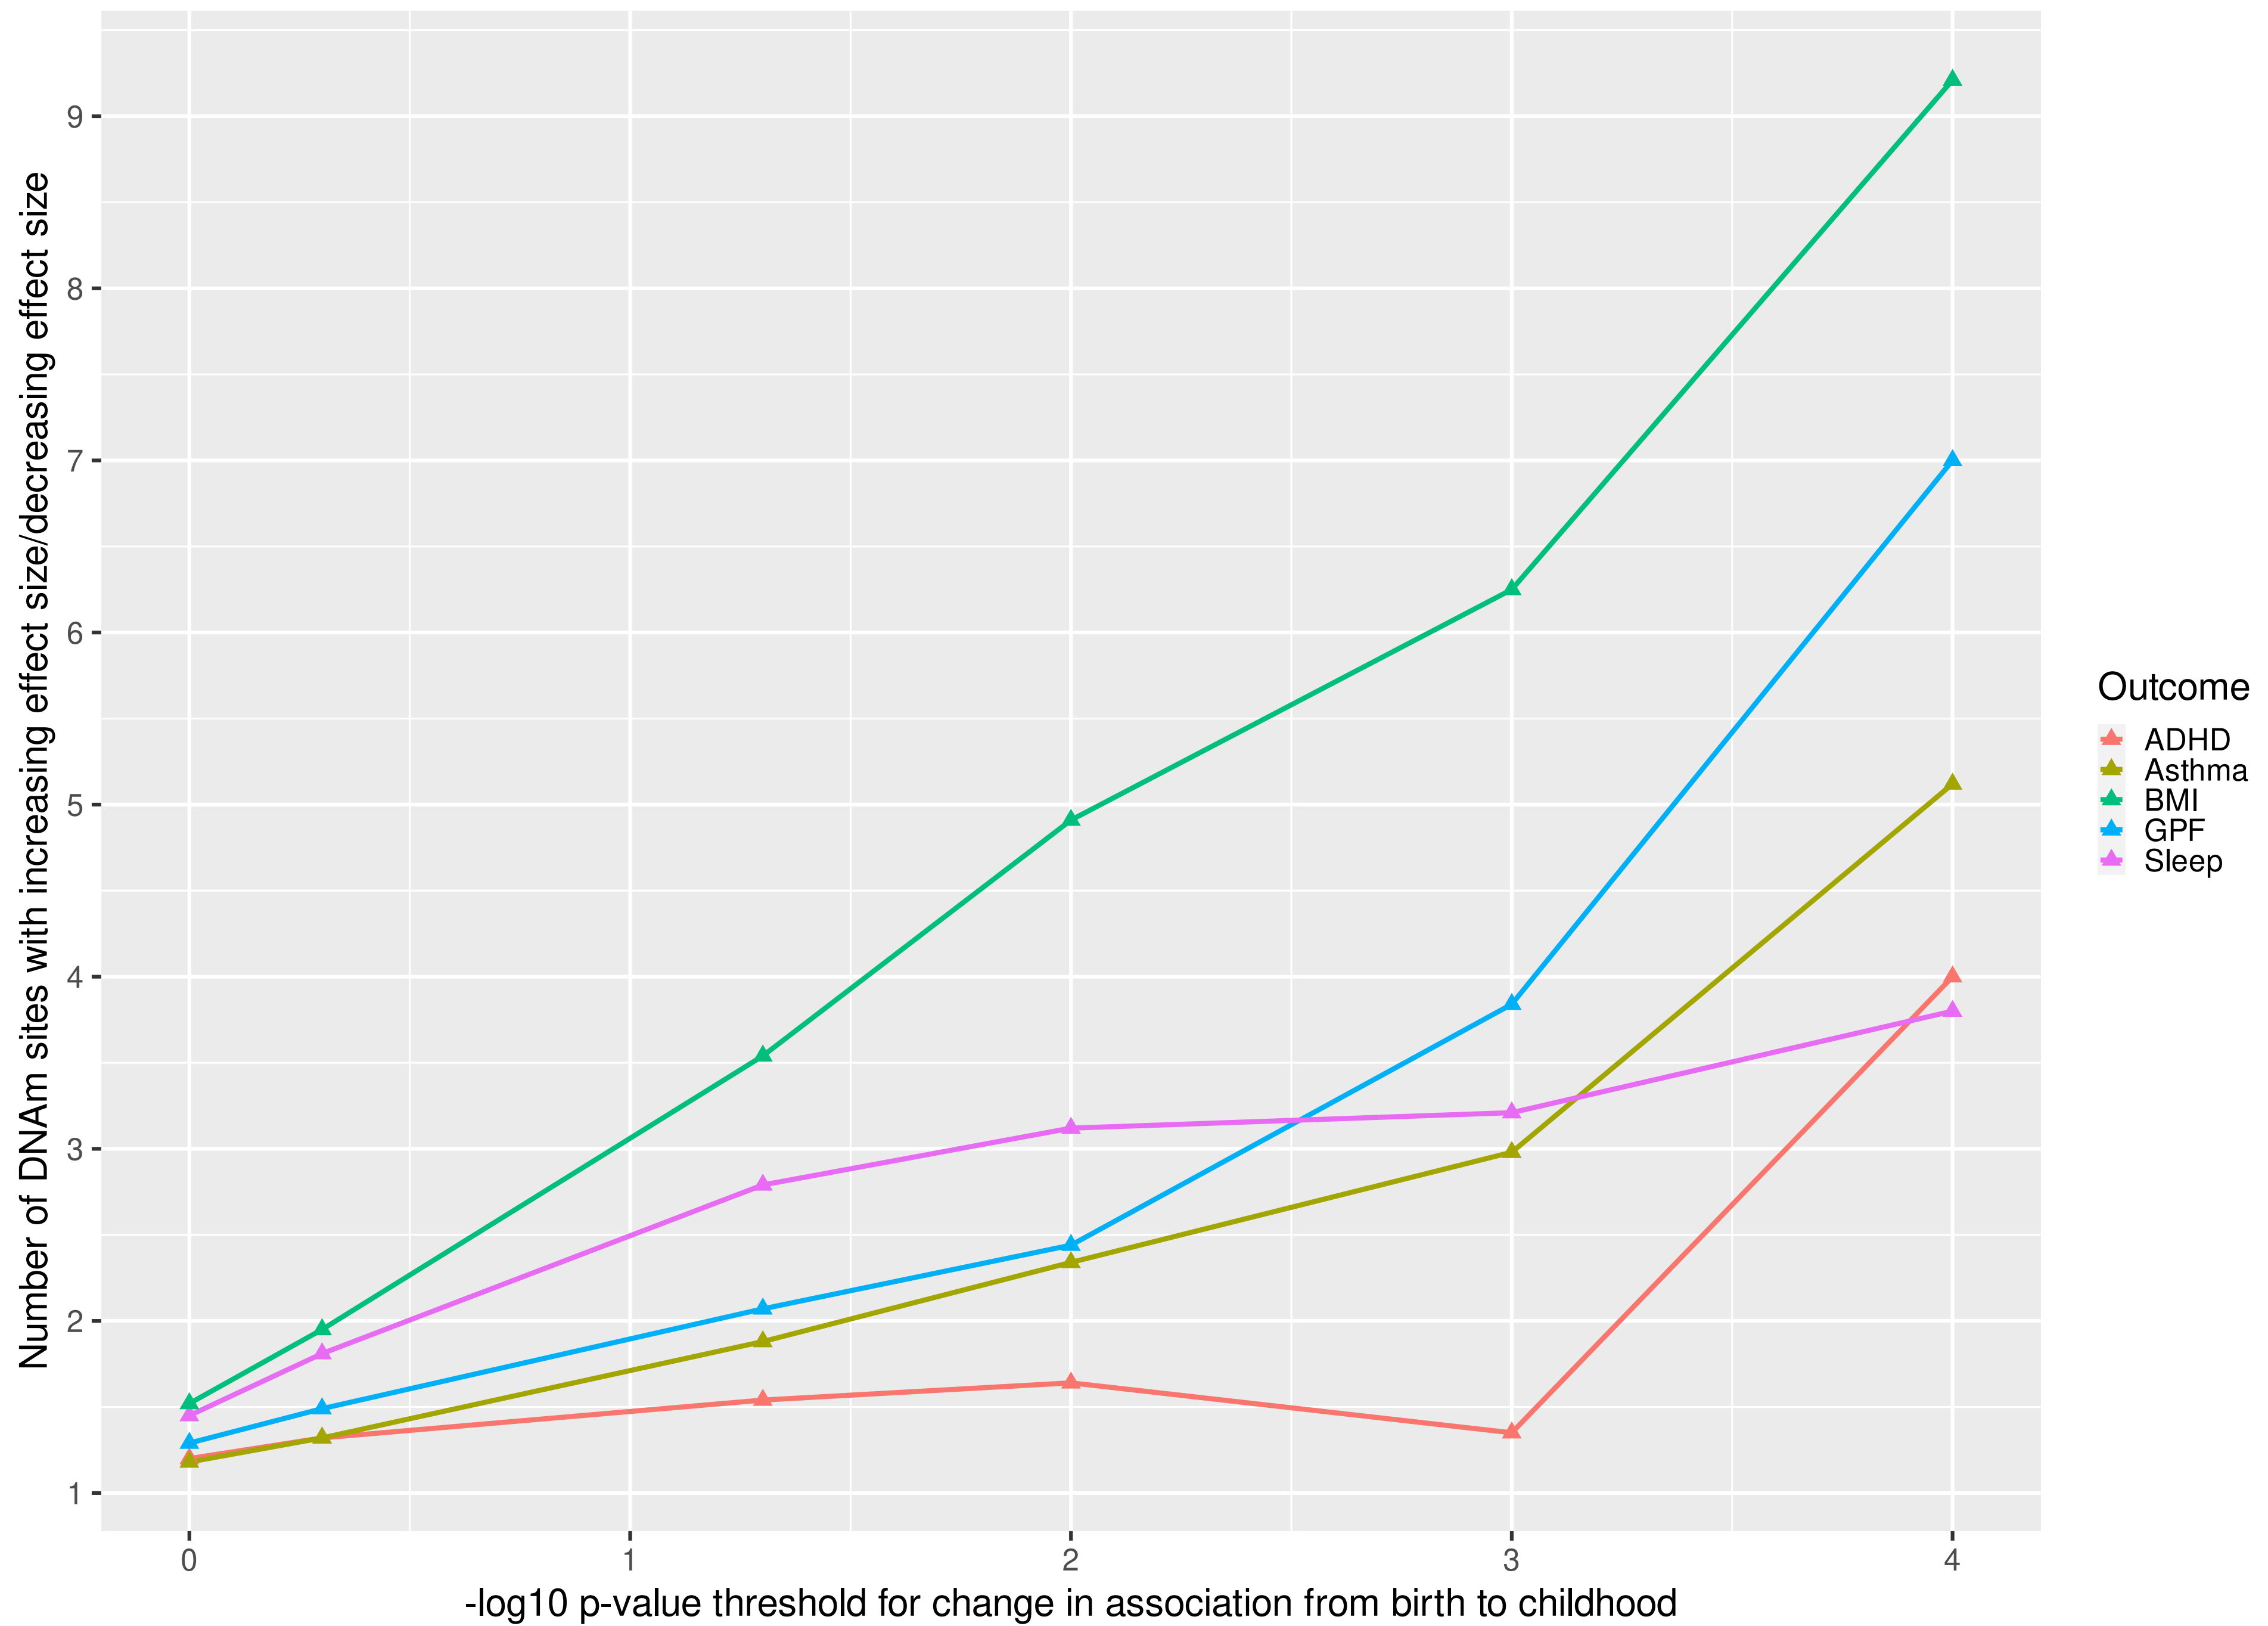

Supplement: Supplementary file [file media-5.pdf]
